# 1 **The retinoic acid receptor drives neuroinflammation and fine tunes the** 2 **homeostasis of interleukin-17-producing T cells**

3 Rasmus Agerholm<sup>1</sup>, John Rizk<sup>1</sup>, Darshana Kadekar<sup>1</sup>, Annie Borch, Sine Reker Hadrup, and  
4 Vasileios Bekiaris\*<sup>1</sup>

## 5 **Affiliations:**

6 <sup>1</sup>Department of Health Technology, Technical University of Denmark, Kemitorvet, Bldg 202, 2800  
7 Kgs Lyngby, Denmark.

8 \*Address correspondence to Vasileios Bekiaris [vasbek@dtu.dk](mailto:vasbek@dtu.dk)

9 **One sentence summary:** Retinoic acid receptor activity was required on IL-17-producing CD4<sup>+</sup>  
10 and  $\gamma\delta$  T cells to induce their neuropathogenicity, and to regulate both positively and negatively  
11 their homeostasis.

## 12 **Abstract**

13 The vitamin A metabolite retinoic acid (RA) and its receptor (RAR) are one of the key interactions  
14 regulating cellular immunity and neural signaling. Whether endogenous RA-RAR interactions  
15 contribute to the development of neuroinflammation and diseases like multiple sclerosis, remains  
16 to be elucidated. Herein, we used the murine experimental autoimmune encephalomyelitis (EAE)  
17 model and an established genetic RAR silencing approach to decipher its role in pathogenic T cell  
18 responses. We show that RAR is necessary for the development of interleukin(IL)-17-driven, cell-  
19 mediated immunopathology in the brain and that it fine tunes the homeostasis of IL-17-producing  
20 gamma delta ( $\gamma\delta$ T17) and CD4<sup>+</sup> T cells (T<sub>H</sub>17). At steady-state, RAR was required in the  $\gamma\delta$ T17  
21 compartment to sustain optimal cell numbers and maintain expression of genes involved in cell  
22 cycle progression. In contrast, RAR negatively regulated T helper-17 (T<sub>H</sub>17) cell homeostasis. Our  
23 data show that RAR is required during the early phases of EAE in order to induce a  $\gamma\delta$ T17  
24 response and that its activity is necessary throughout the course of the disease to allow T<sub>H</sub>17 and  
25  $\gamma\delta$ T17 cells to infiltrate the brain. This is correlated with failure of RAR deficient cells to express  
26 surface integrin- $\alpha$ 4, a major brain homing molecule. Collectively, our work demonstrates that  
27 endogenous RA-RAR interactions are important for the homeostasis of IL-17-producing T cells and  
28 necessary for their pathogenicity during neuroinflammation.

29

## 30 **Introduction**

31 Retinoic acid (RA) is an active metabolite of vitamin A that regulates a large number of cellular  
32 processes (1). The effects of RA are mediated through its transport to the nucleus and binding to  
33 RA receptor (RAR)-retinoid X receptor (RXR) dimers, which initiate gene transcription (2, 3). RAR-  
34 RXR dimers are ubiquitously expressed and active, hence explaining the pleiotropic role of RA  
35 ranging from neuronal development to bone morphology (4-6). In the immune system the RA-RAR  
36 interaction promotes formation of secondary lymphoid tissues (7, 8) during embryogenesis, while  
37 in adulthood, RA production by dendritic cells induces expression of the gut homing molecules  
38 CCR9 and  $\alpha 4\beta 7$  on T cells and innate lymphoid cells (9-11). Besides imprinting gut-tropism, RA is  
39 critical for the differentiation of T-helper ( $T_H$ ) cells and the balance between  $T_H$  cell subsets. Thus,  
40 vitamin A insufficient mice fail to generate  $T_H1$  and  $T_H17$  responses in the intestine after infection  
41 (12), whereas microbiota-driven  $T_H17$  differentiation is impaired (13). Generation of regulatory T  
42 ( $T_{REG}$ ) cells post immunization also appears to be RA dependent (12), which agrees with the  
43 requirement of RA for *in vitro*  $T_{REG}$  differentiation (14-16). Furthermore, RA regulates  $T_H17$  to  $T_H1$   
44 plasticity (17) and is critical for the development of small intestinal intra-epithelial lymphocytes (18,  
45 19).

46  $T_H17$  cells together with IL-17-producing gamma delta T ( $\gamma\delta T17$ ) cells are the major  
47 pathogenic populations in animal models of neuroinflammation, such as experimental autoimmune  
48 encephalomyelitis (EAE) (20-22), and their presence correlates with disease severity in human  
49 multiple sclerosis (MS) (23-26). Hence, suppressing IL-17-secreting T cells is a goal in a number of  
50 treatments aiming to reduce MS pathology (27-29). In this regard, it has been shown that  
51 administration of RA during ongoing EAE or pre-treatment of donor cells with RA prior to transfer  
52 into recipient mice can suppress the function of both  $T_H17$  and  $\gamma\delta T17$  cells and impair their pro-  
53 inflammatory capacity (30, 31). In addition to inhibiting T cell responses, administration of RA can  
54 reduce the production of cytokines by microglia and astrocytes (32). Similarly, astrocytes have  
55 been shown to be a source of RA, which under inflammatory conditions protects the blood-brain  
56 barrier (33). These experiments indicate that exogenously administering RA will have a clear  
57 systemic impact on multiple cellular and tissue compartments making it difficult to assess its

58 precise mechanism of action and its therapeutic potential in MS. It is therefore not surprising that  
59 clinical trials with dietary vitamin A supplementation or synthetic RA compounds have yielded  
60 mixed results (34).

61 Although most of our knowledge regarding the role of RA and RAR in neuroinflammation  
62 stems from in vivo and in vitro treatments with RA itself or retinoid-related compounds, there is no  
63 evidence regarding the importance of endogenous RA. Herein, we used a genetic mouse model  
64 whereby RAR is rendered inactive in cells producing IL-17 and showed that active RAR is  
65 necessary for  $T_H17$  and  $\gamma\delta T17$  cells to respond to neuroinflammatory stimuli, infiltrate the brain and  
66 cause pathology. Thus, mice with inactive RAR in  $T_H17$  and  $\gamma\delta T17$  cells are resistant to EAE and  
67 display limited T cell infiltration in the brain. We additionally provide evidence that RAR is important  
68 to maintain a normal homeostatic environment for IL-17-producing T cells. Our data demonstrate  
69 the importance of endogenous RA-RAR interactions in driving neuropathogenic T cell responses  
70 and emphasize the need for re-evaluating our efforts in using vitamin A and RA supplementation  
71 as a treatment for MS.

72

73

## 74 **Results**

### 75 **Reduced RAR activity in $\gamma\delta T17$ and $CD4^+$ T cells derived from $ROR\gamma t^{CRE}$ - $RARdn^{F/F}$ mice**

76 In order to test the importance of RAR inactivation in IL-17-producing T cells we used mice where  
77 expression of the Cre recombinase is driven by the promoter of the transcription factor  $ROR\gamma t$ ,  
78 which is highly expressed in IL-17-producing lymphocytes. We crossed  $ROR\gamma t^{CRE}$  mice (35) with  
79 mice whereby constitutive expression of a RAR dominant negative (dn) transgene within the  
80 *ROSA26* locus was prevented by a floxed stop codon ( $RARdn^{F/F}$ ) (36). Excision of the stop codon  
81 allows constitutive  $RARdn$  transgene expression, which prevents endogenous RAR from becoming  
82 activated (36). Using  $ROR\gamma t^{CRE}$ - $RARdn^{F/F}$  mice, we recently showed that in the gut, RAR is  
83 important for the production of IFN- $\gamma$  by  $Tbet^+$   $\gamma\delta T17$  cells (20). Owing to their importance in brain  
84 inflammation in EAE, we focused our current investigation on  $CD4^+$  of the  $T_H17$  lineage and  $\gamma\delta T17$   
85 cells.

86 In lymphoid tissues like lymph nodes (LNs),  $\gamma\delta$ T17 populations can be phenotypically  
87 identified by flow cytometry as  $CD27^-CD44^+CCR6^+$ , and can express either the  $V\gamma 4$  or the  $V\gamma 6$   
88 ( $V\gamma 4^-$ ) TCR chains (37, 38) ( $V\gamma$  nomenclature according to Heilig & Tonegawa (39)). Because the  
89  $V\gamma 4^+$  population has been shown to be more pathogenic during neuroinflammation (40), we  
90 analyzed separately  $V\gamma 4^-$  and  $V\gamma 6^-$  expressing cells. To confirm that the RARdn transgene was  
91 expressed, we FACS-sorted  $V\gamma 4^+$  or  $V\gamma 4^-$   $\gamma\delta$ T17 cells from the LN of  $ROR\gamma t^{CRE}-RARdn^{F/F}$  mice,  
92 and compared them to  $\gamma\delta$ T17 cells derived from littermate control mice, or to  $CD27^+$   $\gamma\delta$  T cells,  
93 which are  $ROR\gamma t^-$  and do not produce IL-17 (38). Only  $Cre^+$   $\gamma\delta$ T17 cells expressed the transgene  
94 (Fig. S1a). Because  $ROR\gamma t$  is transiently expressed in double-positive thymocytes, we assessed  
95 RARdn expression in  $CD4^+$  T cells, and found it present, albeit at lower levels than in  $\gamma\delta$ T17 cells  
96 (Fig. S1a). This was most likely due to the reduced activity of the  $ROR\gamma t$ -driven Cre recombinase  
97 in  $CD4^+$  T cells, as we have shown before (41).

98 In order to test whether the transgene was active in the aforementioned populations, we  
99 assessed surface expression of the gut homing receptors CCR9 and  $\alpha 4\beta 7$ , both of which require  
100 RA-RAR interactions to be induced (9). Being an inductive site for gut homing lymphocytes,  
101 mesenteric LN (mLN) derived  $\gamma\delta$  T cells had higher levels of surface CCR9 and  $\alpha 4\beta 7$  compared to  
102 cells from the peripheral skin draining LNs (pLNs) (Fig. S1b). Both molecules displayed lower  
103 abundance in cells from  $ROR\gamma t^{CRE}-RARdn^{F/F}$  mice (Fig. S1c), however  $\alpha 4\beta 7$  levels were very low  
104 in the pLNs and there was no detectable difference between transgenic and littermate control mice  
105 (Fig. S1c). Similar to mLNs, surface CCR9 was reduced in  $\gamma\delta$ T17 cells derived from the small  
106 intestinal or colonic lamina propria (Fig. S1d). We could not detect  $\alpha 4\beta 7$  in gut  $\gamma\delta$ T17 cells.  
107 Although expression of the RARdn transgene was low in  $CD4^+$  T cells (Fig. S1a), we found that in  
108 cells derived from transgenic mice, surface abundance of CCR9 and  $\alpha 4\beta 7$  was reduced (Fig. S2a),  
109 indicating that despite its low levels, the transgene was active in this cellular compartment. It is  
110 noteworthy, that CCR9 and  $\alpha 4\beta 7$  could only be detected in  $CD4^+$  T cells expressing CD44 (Fig.  
111 S2b, c), an adhesion molecule most often used as a memory marker on mouse T cells. This data  
112 suggests that in our model, there is loss of RAR activity in  $\gamma\delta$ T17 and activated  $CD4^+$  T cells.

113

114 **RAR is required for normal  $\gamma\delta$ T17 cell homeostasis**

115 In order to begin addressing the in vivo importance of RAR in  $\gamma\delta$ T17 cells, we enumerated LN  
116  $CD27^-CD44^+CCR6^+$  cells and found that their frequency was reduced in  $ROR\gamma^t^{CRE}-RARdn^{F/F}$  mice  
117 compared to littermate controls (Fig. 1a) with no apparent deficit in their numbers (Fig. 1b). In  
118 these mice the frequency of  $V\gamma 4^+$   $\gamma\delta$ T17 cells was significantly decreased whereas that of  $V\gamma 4^-$   
119 cells was concomitantly increased (Fig. 1c, d). When we analyzed their numbers, we found a small  
120 but significant decrease in  $V\gamma 4^+$  cells (Fig. 1e), whereas  $V\gamma 4^-$  cells remained unchanged (Fig. 1e).

121 Intracellular staining for IL-17A recapitulated the above findings. Thus,  $ROR\gamma^t^{CRE}-RARdn^{F/F}$   
122 mice contained significantly reduced IL-17A-producing  $V\gamma 4^+$  but not  $V\gamma 4^-$   $\gamma\delta$  T cells (Fig. 2a), and  
123 as a result the frequency of  $IL-17A^+V\gamma 4^+$  cells was lower than the frequency of  $IL-17A^+V\gamma 4^-$  cells  
124 (Fig. 2b, c). To test whether the ability of the cells to produce IL-17A was also compromised, we  
125 measured its mean fluorescent intensity (MFI) and found no difference (Fig. 2d). In order to assess  
126 production of IL-22 we stimulated bulk LN cells with IL-23. We found that similar to what we  
127 observed with IL-17A, the frequency of  $IL-22^+V\gamma 4^+$  cells was lower, while that of  $IL-22^+V\gamma 4^-$  cells  
128 was higher in  $ROR\gamma^t^{CRE}-RARdn^{F/F}$  mice compared to littermate controls (Fig. 2e, f). Inactive RAR  
129 did not affect IL-22 secretion (Fig. 2g). Collectively, our data show that in the LN, RAR is required  
130 to maintain normal  $\gamma\delta$ T17 cell homeostasis by specifically regulating numbers of the  $V\gamma 4^-$   
131 expressing population.

132

### 133 **RAR regulates transcription of cell cycle genes in $V\gamma 4^+$ $\gamma\delta$ T17 cells**

134 Due to their specific involvement in driving inflammatory diseases including neuropathogenesis in  
135 the context of EAE (40, 42), we aimed at elucidating the mechanism by which RAR regulates the  
136  $V\gamma 4^-$ -expressing  $\gamma\delta$ T17 population. We found that RAR did not impact on the expression of IL-7R  
137 and  $ROR\gamma^t$  (Fig. S3a), both of which are important in regulating the homeostasis and proliferation  
138 of  $\gamma\delta$ T17 cells (43-46). We then reasoned that decreased  $V\gamma 4^+$  cell numbers were due to defective  
139 embryonic thymic development. However, newborn  $ROR\gamma^t^{CRE}-RARdn^{F/F}$  thymi contained normal  
140 numbers of  $V\gamma 4^+$   $\gamma\delta$ T17 cells and slightly but significantly elevated  $V\gamma 4^-$  cell numbers (Fig. S3b),  
141 suggestive of a post-embryonic defect.

142 To further characterize the molecular changes that occur in  $\gamma\delta$ T17 cells in the absence of  
143 active RAR, we performed RNA-sequencing (RNA-seq) from FACS-sorted  $CD27^-CD44^+V\gamma 4^+$  and

144 CD27<sup>-</sup>CD44<sup>+</sup>V $\gamma$ 4<sup>-</sup>  $\gamma$  $\delta$  T cells derived from LNs of adult ROR $\gamma$ t<sup>CRE</sup>-RARdn<sup>F/F</sup> and littermate control  
145 mice. Principal component analysis (PCA) showed that RAR inhibition did not have a significant  
146 effect on global gene expression (Fig. S4a). Assessment of V $\gamma$  and V $\delta$  chain genes confirmed the  
147 homogeneity of the sorted V $\gamma$ 4<sup>+</sup> population and showed that V $\gamma$ 4<sup>-</sup> cells expressed V $\gamma$ 6 (Fig. S4b).

148 Next, we examined whether there were differentially expressed genes between Cre<sup>+</sup> and Cre<sup>-</sup>  
149 cells and found that within the V $\gamma$ 4<sup>+</sup> population, RAR-deficiency correlated with significantly  
150 reduced expression of 71 genes and induced expression of 39 (Fig. 3a and Fig. S4c). Within the  
151 V $\gamma$ 4<sup>-</sup> population there were 26 genes down- and 19 genes up-regulated significantly (Fig. 3a and  
152 Fig. S4d). Most of the gene expression profiles affected by RAR did not overlap between V $\gamma$ 4<sup>+</sup> and  
153 V $\gamma$ 4<sup>-</sup>  $\gamma$  $\delta$  T cells (Fig. 3a), suggesting subset-specific regulation. In order to understand the  
154 biological processes that these gene changes were affecting we performed pathway analysis of  
155 the differentially expressed genes in ROR $\gamma$ t<sup>CRE</sup>-RARdn<sup>F/F</sup> V $\gamma$ 4<sup>+</sup> cells using GOrilla (47, 48). The  
156 differentially expressed genes in V $\gamma$ 4<sup>-</sup> cells and the up-regulated ones in the V $\gamma$ 4<sup>+</sup> cells did not  
157 enrich for any pathway. However, the genes that were down-regulated in the absence of RAR  
158 activity in V $\gamma$ 4<sup>+</sup> cells were enriched in processes associated with cell cycle and division, mitosis  
159 and chromosomal segregation (Fig 3b). Such genes included cyclins (e.g. *Cdc25c*, *Ccnb1*, *Cdc6*),  
160 kinetochore-associated (e.g. *Zwisch*, *Ska1*, *Ska3*, *Nsl1*) or centrosome-associated (e.g. *Figl1*,  
161 *Poc1a*) genes.

162 This data indicated that RAR may regulate homeostatic turnover of V $\gamma$ 4<sup>+</sup>  $\gamma$  $\delta$ T17 cells. To  
163 directly assess this, we examined expression of the cell cycle progression marker Ki67 at steady-  
164 state. However, there was not a difference in the percentage of cycling cells within the V $\gamma$ 4<sup>+</sup>  
165 population (Fig. 3c). Collectively, our data demonstrate that although RAR is required for the  
166 transcription of a number of genes required for cell cycle progression, this does not manifest as a  
167 defect in G-S phase transition at homeostatic conditions.

168

### 169 **RAR negatively regulates T<sub>H</sub>17 cell homeostasis**

170 Since we discovered that the RARdn transgene was active in CD4<sup>+</sup> T cells (Fig. S2), it was  
171 important to assess their homeostasis in ROR $\gamma$ t<sup>CRE</sup>-RARdn<sup>F/F</sup> mice. In this regard, in the pLN or  
172 mLN, lack of active RAR resulted in equal numbers of total CD4<sup>+</sup> but significantly higher

173 CD4<sup>+</sup>CD44<sup>+</sup> T cells (Fig. 4a and Fig. S5a). Because expression of the transgene is driven by  
174 ROR $\gamma$ t, we sought to more closely investigate T<sub>H</sub>17 cells, which at steady-state express the  
175 chemokine receptor CCR6 (49, 50). To confirm that CD4<sup>+</sup>CCR6<sup>+</sup> T cells were T<sub>H</sub>17-enriched, we  
176 analyzed mice expressing GFP (green fluorescent proteins) under the control of the ROR $\gamma$ t  
177 promoter and AmCyan under the control of the Tbet promoter (20). We show that the CD4<sup>+</sup>CCR6<sup>+</sup>  
178 population contains very few Tbet-expressing cells and approximately 80% of them are ROR $\gamma$ t<sup>+</sup>  
179 (Fig. 4b). Moreover, all of the CCR6-expressing cells were CD44<sup>+</sup> (Fig. 4c). Next, we assessed  
180 numbers of CD4<sup>+</sup>CCR6<sup>+</sup> T cells, and found that they were significantly increased in the LNs of  
181 ROR $\gamma$ t<sup>CRE</sup>-RARdn<sup>F/F</sup> mice compared to controls (Fig. 4d and Fig. S5b). In contrast, numbers of  
182 CD4<sup>+</sup>CCR6<sup>-</sup> cells, were not affected in ROR $\gamma$ t<sup>CRE</sup>-RARdn<sup>F/F</sup> mice (Fig. 4d), suggesting that the  
183 major impact of RAR in these animals is on T<sub>H</sub>17 cells. In agreement with this, we detected  
184 significantly more IL-17- and IL-22-producing CD4<sup>+</sup>CD44<sup>+</sup> T cells in LNs of mice with inactive RAR  
185 (Fig. 4e). Since, the intestine is enriched in T<sub>H</sub>17 cells, we additionally analyzed small intestinal  
186 lamina propria lymphocytes and found significantly elevated frequencies of IL-17-producing CD4<sup>+</sup>  
187 T cells (Fig. S5c). Collectively, our data suggests that RAR negatively regulates the numbers and  
188 IL-17 production of T<sub>H</sub>17 cells at steady-state.

189

### 190 **ROR $\gamma$ t<sup>CRE</sup>-RARdn<sup>F/F</sup> mice are resistant to EAE**

191 A combined response between T<sub>H</sub>17 and  $\gamma\delta$ T17 cells is required for the development and  
192 progression of experimental autoimmune encephalomyelitis (EAE) (21, 22). We therefore induced  
193 EAE in ROR $\gamma$ t<sup>CRE</sup>-RARdn<sup>F/F</sup> and littermate control mice and assessed disease progression as well  
194 as T cell responses in the LNs, spleen, and brain at the peak of the disease. We found that by  
195 comparison to controls, ROR $\gamma$ t<sup>CRE</sup>-RARdn<sup>F/F</sup> mice were resistant to EAE symptoms (Fig. 5a) and  
196 showed reduced weight loss (Fig. 5b). Paralysis in EAE is caused by infiltration of pathogenic T  
197 cells in the brain. We found that contrary to control symptomatic animals, mice with defective RAR  
198 had very few CD4<sup>+</sup>CD44<sup>+</sup> and  $\gamma\delta$ T17 cells in the brain at the peak of the disease, 21 days post-  
199 immunization (Fig. 5c, d). Of note, expression of CCR6 was almost undetectable in the brain (Fig.  
200 5c), most likely reflecting the local production of CCL20 by choroid plexus epithelia (51). When we  
201 analyzed the CD4 responses in the LNs and spleen we found elevated numbers of CD4<sup>+</sup>CD44<sup>+</sup> T

202 cells, irrespective of whether they were CCR6<sup>+</sup> or CCR6<sup>-</sup> (Fig. S6a, b). Numbers of  $\gamma\delta$ T17 cells  
203 were not changed at that time point (Fig. S7a, b). We additionally tested the capacity of both CD4<sup>+</sup>  
204 and  $\gamma\delta$  T cells to produce IL-17. We found that although there was no difference in the frequency  
205 of IL-17-producing CD4<sup>+</sup> T cells at day 21, production of IL-17 did not increase between  
206 unimmunized and immunized ROR $\gamma$ t<sup>CRE</sup>-RARdn<sup>F/F</sup> mice (Fig. 5e and Fig. S6c). Production of IL-17  
207 by  $\gamma\delta$  T cells was slightly but significantly decreased in LNs and spleen at day 21 (Fig. 5f and Fig.  
208 S7c). Therefore, effective RA-RAR interactions are necessary for T cells to infiltrate the brain and  
209 cause neuropathology, but have a minor impact on lymphoid tissue responses at the peak of the  
210 disease.

211

## 212 **RAR is important to initiate $\gamma\delta$ T17 responses and sustain integrin- $\alpha$ 4 during EAE**

213 Next, we wanted to investigate why there was a failure to infiltrate the brain and why RAR  
214 deficiency had such a profound impact on disease progression. It has been shown recently that  
215 early events driven primarily by  $\gamma\delta$  T cells are critical to establish disease progression in EAE (40).  
216 We therefore assessed both  $\gamma\delta$  and CD4<sup>+</sup> T cell responses in ROR $\gamma$ t<sup>CRE</sup>-RARdn<sup>F/F</sup> and littermate  
217 control mice, at day 11, before any clinical symptoms were observable. As expected, the CD4<sup>+</sup> T  
218 cell response was not compromised in transgenic animals, instead there was a consistent increase  
219 in the numbers of CD4<sup>+</sup>CCR6<sup>+</sup> T cells (Fig. 6a, b). In contrast, there was a profound reduction in  
220  $\gamma\delta$ T17 cell numbers in the spleen and LNs (Fig. 7a, b). This difference could be attributed to a  
221 failure of the V $\gamma$ 4-expressing population to expand in response to immunization (Fig. 7a, b). Thus,  
222 during the early phases of the disease, RAR is critical to initiate  $\gamma\delta$ T17-driven inflammation,  
223 especially of the V $\gamma$ 4<sup>+</sup> population.

224 As we showed earlier (Fig. S1) and others before, RAR is critical for the expression of the gut  
225 homing receptor  $\alpha$ 4 $\beta$ 7. In addition to pairing with the  $\beta$ 7 chain, the  $\alpha$ 4 integrin (CD49d) can also  
226 pair with the  $\beta$ 1 chain to form the  $\alpha$ 4 $\beta$ 1 integrin (VLA-4), which is important for entry of pathogenic  
227 lymphocytes into the brain during EAE (52, 53). Furthermore, blockade of  $\alpha$ 4 with a humanized  
228 monoclonal antibody (natalizumab), has been licensed as a therapeutic intervention for MS (54).  
229 We therefore assessed the levels of expression of integrin- $\alpha$ 4 (Itga4) during EAE in CD4<sup>+</sup> and  $\gamma\delta$  T  
230 cells from ROR $\gamma$ t<sup>CRE</sup>-RARdn<sup>F/F</sup> and littermate control mice. We found that RAR deficient CD4<sup>+</sup> T



231 cells expressed significantly lower amounts of Itga4 at day 11 following MOG immunization (Fig.  
232 6c-e). In  $\gamma\delta$ T17 cells, there was reduced expression of Itga4 in the  $V\gamma 4^+$  but not the  $V\gamma 4^-$   
233 population (Fig. 7d, e). Collectively, this data suggests that during neuroinflammation, in addition to  
234 initiating  $\gamma\delta$ T17 expansion, RAR sustains expression of Itga4 in both the  $CD4^+$  and  $\gamma\delta$  T cell  
235 compartments, which might explain why effector IL-17-producing cells do not infiltrate the brain  
236 and cause pathology in  $ROR\gamma t^{CRE}$ - $RARdn^{F/F}$  mice.

237

## 238 Discussion

239 In the present study we provide evidence that RA-RAR interactions are necessary to induce IL-17-  
240 driven brain pathology. Active RAR was required by the  $V\gamma 4$ -expressing subset of IL-17-producing  
241  $\gamma\delta$  T cells in order to mount an early encephalitogenic response, and by IL-17-producing  $CD4^+$  and  
242  $\gamma\delta$  T cells to infiltrate the brain; most likely due to reduced levels of surface Itga4. Furthermore, we  
243 provide evidence that RAR is a negative regulator of  $T_H17$  homeostasis, whereas it positively  
244 regulates the homeostasis of  $\gamma\delta$ T17 cells. Hence, inactivation of RAR led to a subset-specific  
245 suppression of  $\gamma\delta$ T17 cells and correlated with reduced expression of cell cycle genes, whereas it  
246 increased the numbers of  $T_H17$  cells at steady-state.

247 Sensing of intracellular RA by RAR initiates cell subset transcriptional programs that are as  
248 diverse as phototransduction and organogenesis (6). In the central nervous system, RA plays an  
249 indispensable role during development, while it also appears to be important in regulating the  
250 homeostatic function of the adult brain (55). Simultaneously, unperturbed RA-RAR interactions are  
251 necessary for the normal function of most immune cells (1). It has therefore been very hard to  
252 pinpoint the precise biological importance of RA and RAR in neuroinflammatory diseases such as  
253 MS. Our data shows that active RAR is necessary in IL-17-producing T cells to become activated  
254 in response to neuroinflammatory signals, infiltrate the brain and cause disease. These findings  
255 agree with the notion that RA-RAR interactions are critical for a functional immune system,  
256 including when the response is pathogenic. Therefore, acute ablation of the RA-RAR interaction  
257 may prevent T cell activation or recruitment to the brain and alleviate MS-associated symptoms.

258 Given that the vast majority of the western population, including MS patients, do not suffer  
259 from vitamin A deficiency, it is endogenous, homeostatic levels of RA that fine tune both immune

260 and neurological function. Therefore, dietary supplementation for the treatment of MS may be  
261 unnecessary or redundant, which might explain why related clinical trials have yielded mixed  
262 results (34). Synthetic RA or RA-related compounds have been shown before to have direct and  
263 acute influence on the immune system (12). In this regard, an exogenously supplied RA mimic in  
264 mice delayed induction of EAE (30). Whether the compound acted on the immune system or  
265 directly in the brain was not addressed, while the apparent inhibition on IL-17 by CD4<sup>+</sup> T cells was  
266 only evident after continuous in vitro stimulation (30). Similarly, in vitro treatment of T cells with RA  
267 prior to adoptive transfer in recipient animals under conditions inducing EAE, suppressed IL-17  
268 and lowered disease incidence (31). However, the in vivo immuno-modulatory effects of RA  
269 administration on IL-17-secreting populations during EAE have not been elucidated. Although our  
270 findings argue that RA is necessary for the optimal activation of IL-17-producing T cells during  
271 inflammation, it is plausible that exogenous RA may act indirectly or as a death-inducing molecule  
272 (56) to promote immuno-suppression.

273 One of the most well-studied effects of RA on immune cells, especially T cells, is tissue  
274 homing through regulation of the chemokine receptor CCR9 and the integrin subunit Itg $\alpha$ 4 (9), both  
275 of which are RA inducible genes (57, 58). The  $\alpha$ 4 subunit can pair with Itg $\beta$ 1 to form the brain-  
276 homing integrin  $\alpha$ 4 $\beta$ 1, also known as VLA-4 (52, 53). The importance of Itg $\alpha$ 4 in regulating the  
277 homing of pathogenic immune cells to the brain is exemplified by the use of an anti-Itg $\alpha$ 4 blocking  
278 antibody for the treatment of MS patients (54). In our studies, diminished infiltration of pathogenic T  
279 cells in the brain when RAR was inactive, correlated with very low levels of Itg $\alpha$ 4. This suggests  
280 that during conditions of neuroinflammation, RA-RAR interactions are necessary to maintain  
281 expression of Itg $\alpha$ 4 and allow T cells to home to the brain. Therefore, therapeutic targeting of the  
282 RA pathway is very likely to alter the migratory capacity of encephalitogenic T cells.

283 In addition to adhesion and migration, RA regulates a plethora of immunological processes,  
284 which are often cell subset and context dependent. In this regard, lack of active RAR affected only  
285 the V $\gamma$ 4-expressing subset of  $\gamma$  $\delta$ T17 cells both at steady-state and during the early stages of  
286 neuroinflammation. This was somewhat unexpected since recent RNA-seq analyses indicated that  
287 in the LNs, the two  $\gamma$  $\delta$ T17 subsets (V $\gamma$ 4<sup>+</sup> and V $\gamma$ 6<sup>+</sup>) are nearly identical (59). It is plausible that the  
288 two subsets occupy distinct niches within the LN where RA may be differentially produced by

289 accessory cells within the immediate microenvironment. A potential underlying mechanism by  
290 which RA regulates  $\gamma\delta$ T17 subsets is by fine tuning the expression of cell cycle genes, a process  
291 that is well-documented in different cell types (4, 56). Thus, intact RA production and RAR activity  
292 are important for optimal proliferation of fetal cardiomyocytes (60), endothelial vasculature (61),  
293 intestinal stem cells (62) and cerebral glial cells (36). However, there is limited information on  
294 whether and how RA and RAR regulate T cell proliferation. It has been shown that RA can boost in  
295 vitro human T cell proliferation by regulating cyclin D proteins (63, 64), while in vivo, RAR  
296 enhanced CD4<sup>+</sup> T cell proliferation during intestinal infection with the parasite *Toxoplasma gondii*  
297 (12). Our data clearly show that at steady-state RAR negatively regulates the number of T<sub>H</sub>17  
298 cells, a defect that was evident throughout the course of EAE.

299 Collectively, our data show that intrinsic RA-RAR interactions are necessary for the  
300 development of pathogenic neuroinflammation by establishing a coordinated response by IL-17-  
301 producing T cell subsets and promoting their ability to infiltrate the brain. Furthermore, we provide  
302 evidence that RAR is a critical homeostatic rheostat of IL-17-producing T cells by imposing cell  
303 subset specific positive and negative regulation. This study highlights the importance of RA and its  
304 receptor as key molecular determinants of T cell driven inflammation of the CNS and paves the  
305 way for reevaluating their role as potential therapeutic targets in MS.

306

## 307 **Materials and Methods**

### 308 **Mice**

309 All animal breeding and experiments were performed in house and only after approval from the  
310 Danish Animal Experiments Inspectorate. ROR $\gamma$ <sup>CRE</sup> (65) mice were provided by Gerard Eberl.  
311 RARdn<sup>F/F</sup> mice (36) were provided by William Agace after permission from San Sockanathan.  
312 ROR $\gamma$ <sup>GFP</sup>Tbet<sup>AmCyan</sup> mice were described before (20).

313

### 314 **Cell preparation and culture**

315 Dissected LNs and spleens were isolated and processed as previously described (41). Briefly, they  
316 were crushed through a cell strainer and washed before being re-suspended in culture media  
317 (RPMI containing 10% FBS, Penicillin/Streptomycin, 0.1%  $\beta$ -ME, 20mM HEPES and L-Glutamine)

318 (media and supplements from ThermoFisher) at the desired density of  $10^7$ /ml of which  $2.5 \times 10^6$   
319 were used for subsequent flow cytometry experiments. An extra RBC lysis step was used for  
320 spleens. For cytokine detection  $10^7$  cells per well in a 12-well plate were cultured for 3.5 hours in  
321 the presence of 50ng/ml PMA, 750ng/ml Ionomycin and  $10^{-3}$  diluted Golgi Stop™ (monensin). To  
322 detect IL-22 cells were cultured overnight with 40ng/ml recombinant mouse IL-23 (R&D Systems).  
323 To prepare  $\gamma\delta$  T cells and  $CD4^+$  T cells for cell sorting, lymphocytes were enriched by magnetic  
324 depletion of CD8 T cells and B cells; briefly,  $1 \times 10^8$  lymphocytes were re-suspended in MACS buffer  
325 (2% FBS, 1 mM EDTA in PBS) and incubated with biotin conjugated anti-CD8 (53-6.7) and anti-  
326 CD19 (6D5) at a dilution of 1:200 (both from Biolegend) and 50 $\mu$ L/mL normal rat serum for 10 min  
327 at RT. Subsequently, 75 $\mu$ L/mL of BD IMag Streptavidin Particles Plus – DM were added to the  
328 mixture and incubated for an additional 2.5 minutes. The samples were incubated for 2.5 minutes  
329 in an EasySep™ Magnet and the negative fraction collected.

330 To prepare lamina propria lymphocytes from the small intestine and colon the tissue was  
331 initially flushed with HBSS/HEPES (pH 7.4) and then fat and Peyer's patches were mechanically  
332 removed. Tissue was cut into 2-3 cm pieces and washed 4 times (15 min each) in HBSS/2mM  
333 EDTA at 37°C shaking followed by digestion with 0.06mg/ml Roche Liberase TM and 0.03mg/ml  
334 DNase I (all enzymes from Sigma-Aldrich) for 40 min at 37°C with stirring at 700 rpm. Cell  
335 suspension was then pelleted and then re-suspended in 4 mL 40% Percoll (GE Healthcare),  
336 layered on 4 mL 70% Percoll and centrifuged at 800xg (RT) for 20 min with breaks set to zero.  
337 Interphase cells were washed with culture media before further use.

338

### 339 **Experimental Autoimmune Encephalomyelitis**

340 EAE was induced by sub-cutaneous injection of 50 $\mu$ g of MOG35-55 peptide in CFA, while 200 ng  
341 pertussis toxin were intra-peritoneally (i.p.) injected on the day of immunization and 2 days later.  
342 From day 11 after immunization and until day 21, mice were weighed and scored for clinical signs  
343 as follows: 0: no symptoms; 1: tail paralysis; 1.5: impaired righting reflex; 2: paralysis of one hind  
344 limb; 2.5: paralysis of both hind limbs; 3: paralysis of one fore limb; 3.5: paralysis of one fore limb  
345 and weak second for limb; 4: total limb paralysis. Mice were euthanized at days 21 after  
346 immunization and were perfused with PBS. LN cells were isolated as described above. Brain

347 tissue was mechanically minced and passed through a 70 $\mu$ m cell strainer to obtain a single cell  
348 suspension. Lymphocytes were separated using density gradient centrifugation with 47% Percoll  
349 (GE Healthcare), layered on 4 mL of 70% Percoll, and centrifuged at 20 °C and 900  $\times$  g for 30 min  
350 with deceleration set to 0.

351

## 352 **Flow Cytometry**

353 Cells were stained in U-bottom 96-well plates in 75 $\mu$ l PBS containing 3% FBS with combinations of  
354 the following antibodies: CD4-FITC (RM4-4), CD19-FITC (6D5), CD8-FITC (53-6.7), TCR $\beta$ -  
355 APCeF780 (H57-597; eBioscience), TCR $\gamma\delta$ -BV421 (GL3), CD44-V500 (IM7), CCR6-AF647  
356 (140706), V $\gamma$ 4-PerCPeF710 (UC3-10A6), CCR9-PE (eBioCW-1.2; eBioscience),  $\alpha$ 4 $\beta$ 7-PECF594  
357 (DATK32), CD3-PECy7 (145-2C11), CD27-PECy7 (LG.3A10), V $\gamma$ 5-FITC (536), CD3-PE (145-  
358 2C11; BioLegend), CD3-PECF594 (145-2C11), CCR9-APC (eBIOCW-1.2; eBioscience), CD49d-  
359 PE (R1-2; eBioscience), CD69-PECF594 (H1.2F3), CD45-V500 (30-F11), ROR $\gamma$ t-APC (B2D),  
360 CD127-BUV737 (SB/199), IL-17A-BV786 (TC11-18H10), IL-22-PE (1H8PWSR; eBioscience),  
361 IFN $\gamma$ -PE (XMG1.2; BioLegend), IFN $\gamma$ -APC (XMG1.2; BioLegend), Ki67-BV786 (B56). Cells were  
362 stained for 30 minutes on ice and all antibodies were used at a 1:200 dilution, except Ki67 which  
363 was used at a 1:100 dilution. Prior to antibody staining cells were incubated with 100 $\mu$ l PBS  
364 containing 10<sup>-3</sup> diluted Fixable Viability Dye AF700 for 10 minutes on ice. Cells were washed in  
365 150 $\mu$ l PBS containing 3% FBS in-between steps. Intracellular cytokine staining was performed  
366 using the BD Cytofix/Cytoperm Kit™ according to the manufacturer's instructions. Transcription  
367 factor staining was performed using the eBioscience FoxP3 Transcription Factor Staining kit  
368 according to the manufacturer's instructions. Unless specified all antibodies and staining reagents  
369 were purchased from BD Biosciences. Samples were acquired on a BD LSR Fortessa™ using BD  
370 FACSDiva software v8.0.2.

371

## 372 **Bulk RNA-seq**

373 Lymphocytes were isolated from peripheral, cervical and auricular LNs of ROR $\gamma$ t<sup>CRE</sup>-RAR $\alpha$ <sup>F/F</sup> or  
374 littermate control mice and  $\gamma\delta$  T cells were enriched as described above. Subsequently,  
375 V $\gamma$ 4<sup>+</sup>TCR $\gamma\delta$ <sup>+</sup>CD3<sup>+</sup>CD44<sup>+</sup>CD27<sup>-</sup> and V $\gamma$ 4<sup>-</sup>TCR $\gamma\delta$ <sup>+</sup>CD3<sup>+</sup>CD44<sup>+</sup>CD27<sup>-</sup> populations from each mouse

376 strain were sorted using a FACSAriaIII: populations into RNA protect (QIAGEN, Hilden, Germany).  
377 Total RNA was extracted from the sorted cells according to the “Purification of total RNA from  
378 animal and human cells” protocol of the RNeasy Plus Micro Kit (QIAGEN). After pelleting by  
379 centrifugation for 5 minutes at 5,000 x g, the RNA protect was replaced by 350 µl buffer RLT Plus  
380 and the samples were homogenized by vortexing for 30 sec. Genomic DNA contamination was  
381 removed using gDNA Eliminator spin columns. Next, one volume of 70 % ethanol was added and  
382 the samples were applied to RNeasy MinElute spin columns followed by several wash steps.  
383 Finally, total RNA was eluted in 12 µl of nuclease free water. Purity and integrity of the RNA was  
384 assessed on the Agilent 2100 Bioanalyzer with the RNA 6000 Pico LabChip reagent set (Agilent,  
385 Palo Alto, CA, USA).

386 The SMARTer Ultra Low Input RNA Kit for Sequencing v4 (Clontech Laboratories, Inc.,  
387 Mountain View, CA, USA) was used to generate first strand cDNA from 100 pg total-RNA. Double  
388 stranded cDNA was amplified by LD PCR (13 cycles) and purified via magnetic bead clean-up.  
389 Library preparation was carried out as described in the Illumina Nextera XT Sample Preparation  
390 Guide (Illumina, Inc., San Diego, CA, USA). 150 pg of input cDNA were tagmented (tagged and  
391 fragmented) by the Nextera XT transposome. The products were purified and amplified via a  
392 limited-cycle PCR program to generate multiplexed sequencing libraries. For the PCR step 1:5  
393 dilutions of index 1 (i7) and index 2 (i5) primers were used. The libraries were quantified using the  
394 KAPA SYBR FAST ABI Prism Library Quantification Kit (Kapa Biosystems, Inc., Woburn, MA,  
395 USA). Equimolar amounts of each library were sequenced on a NextSeq 500 instrument controlled  
396 by the NextSeq Control Software (NCS) v2.2.0, using a 75 Cycles High Output Kit with the single  
397 index, single-read (SR) run parameters. Image analysis and base calling were done by the Real  
398 Time Analysis Software (RTA) v2.4.11. The resulting .bcl files were converted into .fastq files with  
399 the bcl2fastq v2.18 software. RNA extraction, library preparation and RNAseq were performed at  
400 the Genomics Core Facility “KFB - Center of Excellence for Fluorescent Bioanalytics” (University of  
401 Regensburg, Regensburg, Germany; [www.kfb-regensburg.de](http://www.kfb-regensburg.de)). Data have been deposited in the  
402 ArrayExpress repository with the dataset identifier E-MTAB-8554.

403

404 **RNA extraction, cDNA synthesis and real-time PCR**

405 Cells were processed as described in previous section. RNA from TCR $\gamma\delta^+$ CD44 $^+$ CD27 $^+$ V $\gamma$ 4 $^+$ ,  
406 TCR $\gamma\delta^+$ CD44 $^+$ CD27 $^+$ V $\gamma$ 4 $^-$ , TCR $\gamma\delta^+$ CD27 $^+$ , or CD4 $^+$  T cells was extracted using the RNeasy micro  
407 kit (Qiagen) followed by cDNA synthesis using the iScript cDNA synthesis kit (BioRad), according  
408 the manufacturers' protocol. Real-time PCR reactions were performed with SsoFast EvaGreen  
409 Supermic (BioRad) on a CFX96 (BioRad) cyclers. The following primers were used: RARdn  
410 transgene Fwd-AAGCCCGAGTGCTCTGAGA, Rev-TTCGTAGTGTATTTGCCAG; b-actin Fwd-  
411 GGCTGTATTCCCCTCCATCG, Rev-CCAGTTGGTAACAATGCCATGT.

412

### 413 **Data Analysis**

414 Flow cytometry data was analyzed using Flow Jo v9.8.3 or v10. All graphs associated to flow  
415 cytometry were generated using Prism v8 and statistically analyzed using unpaired non-parametric  
416 Mann-Whitney U-test. For EAE experiments, clinical scoring and weights were analyzed using 2-  
417 way ANOVA with Bonferroni's multiple comparisons test. The RNAseq data was initially  
418 pseudoaligned using Kallisto (66) with the BioMart package and the ensemble data base as  
419 reference with the Jul2019 archive. Further downstream analysis was done using the DESeq2  
420 package for R (67). The DESeq2 package was also used to calculate statistical significance  
421 between sample comparisons by employing the Wald-test for p values and the Benjamini-  
422 Hochberg adjustment for padj values. Real-time data was analyzed using the Bio-Rad CFX  
423 manager software, with gene expression normalized to that of  $\beta$ -actin.

424

### 425 **References**

- 426 1. M. N. Erkelens, R. E. Mebius, Retinoic Acid and Immune Homeostasis: A Balancing Act.  
427 *Trends Immunol* **38**, 168-180 (2017).
- 428 2. J. A. Hall, J. R. Grainger, S. P. Spencer, Y. Belkaid, The role of retinoic acid in tolerance  
429 and immunity. *Immunity* **35**, 13-22 (2011).
- 430 3. G. Duester, Retinoic acid synthesis and signaling during early organogenesis. *Cell* **134**,  
431 921-931 (2008).
- 432 4. M. R. Conserva, L. Anelli, A. Zagaria, G. Specchia, F. Albano, The Pleiotropic Role of  
433 Retinoic Acid/Retinoic Acid Receptors Signaling: From Vitamin A Metabolism to Gene  
434 Rearrangements in Acute Promyelocytic Leukemia. *Int J Mol Sci* **20**, (2019).
- 435 5. N. R. de Almeida, M. Conda-Sheridan, A review of the molecular design and biological  
436 activities of RXR agonists. *Med Res Rev* **39**, 1372-1397 (2019).
- 437 6. N. B. Ghyselink, G. Duester, Retinoic acid signaling pathways. *Development* **146**,  
438 (2019).

- 439 7. S. A. van de Pavert *et al.*, Chemokine CXCL13 is essential for lymph node initiation and  
440 is induced by retinoic acid and neuronal stimulation. *Nat Immunol* **10**, 1193-1199  
441 (2009).
- 442 8. S. A. van de Pavert *et al.*, Maternal retinoids control type 3 innate lymphoid cells and  
443 set the offspring immunity. *Nature* **508**, 123-127 (2014).
- 444 9. W. W. Agace, E. K. Persson, How vitamin A metabolizing dendritic cells are generated in  
445 the gut mucosa. *Trends Immunol* **33**, 42-48 (2012).
- 446 10. K. M. Luda *et al.*, IRF8 Transcription-Factor-Dependent Classical Dendritic Cells Are  
447 Essential for Intestinal T Cell Homeostasis. *Immunity* **44**, 860-874 (2016).
- 448 11. M. H. Kim, E. J. Taparowsky, C. H. Kim, Retinoic Acid Differentially Regulates the  
449 Migration of Innate Lymphoid Cell Subsets to the Gut. *Immunity* **43**, 107-119 (2015).
- 450 12. J. A. Hall *et al.*, Essential role for retinoic acid in the promotion of CD4(+) T cell effector  
451 responses via retinoic acid receptor alpha. *Immunity* **34**, 435-447 (2011).
- 452 13. H. R. Cha *et al.*, Downregulation of Th17 cells in the small intestine by disruption of gut  
453 flora in the absence of retinoic acid. *J Immunol* **184**, 6799-6806 (2010).
- 454 14. J. L. Coombes *et al.*, A functionally specialized population of mucosal CD103+ DCs  
455 induces Foxp3+ regulatory T cells via a TGF-beta and retinoic acid-dependent  
456 mechanism. *J Exp Med* **204**, 1757-1764 (2007).
- 457 15. C. M. Sun *et al.*, Small intestine lamina propria dendritic cells promote de novo  
458 generation of Foxp3 T reg cells via retinoic acid. *J Exp Med* **204**, 1775-1785 (2007).
- 459 16. D. Mucida *et al.*, Reciprocal TH17 and regulatory T cell differentiation mediated by  
460 retinoic acid. *Science* **317**, 256-260 (2007).
- 461 17. C. C. Brown *et al.*, Retinoic acid is essential for Th1 cell lineage stability and prevents  
462 transition to a Th17 cell program. *Immunity* **42**, 499-511 (2015).
- 463 18. B. S. Reis, D. P. Hoytema van Konijnenburg, S. I. Grivennikov, D. Mucida, Transcription  
464 factor T-bet regulates intraepithelial lymphocyte functional maturation. *Immunity* **41**,  
465 244-256 (2014).
- 466 19. B. S. Reis, A. Rogoz, F. A. Costa-Pinto, I. Taniuchi, D. Mucida, Mutual expression of the  
467 transcription factors Runx3 and ThPOK regulates intestinal CD4(+) T cell immunity.  
468 *Nat Immunol* **14**, 271-280 (2013).
- 469 20. D. Kadekar *et al.*, The neonatal microenvironment programs innate gammadelta T cells  
470 through the transcription factor STAT5. *J Clin Invest* **130**, 2496-2508 (2020).
- 471 21. C. E. Sutton *et al.*, Interleukin-1 and IL-23 induce innate IL-17 production from  
472 gammadelta T cells, amplifying Th17 responses and autoimmunity. *Immunity* **31**, 331-  
473 341 (2009).
- 474 22. Ivanov, II *et al.*, The orphan nuclear receptor RORgammat directs the differentiation  
475 program of proinflammatory IL-17+ T helper cells. *Cell* **126**, 1121-1133 (2006).
- 476 23. C. A. Dendrou, L. Fugger, M. A. Friese, Immunopathology of multiple sclerosis. *Nat Rev*  
477 *Immunol* **15**, 545-558 (2015).
- 478 24. M. Hiltensperger, T. Korn, The Interleukin (IL)-23/T helper (Th)17 Axis in  
479 Experimental Autoimmune Encephalomyelitis and Multiple Sclerosis. *Cold Spring Harb*  
480 *Perspect Med* **8**, (2018).
- 481 25. L. Schirmer, V. Rothhammer, B. Hemmer, T. Korn, Enriched CD161high CCR6+  
482 gammadelta T cells in the cerebrospinal fluid of patients with multiple sclerosis. *JAMA*  
483 *Neurol* **70**, 345-351 (2013).
- 484 26. J. van Langelaar *et al.*, T helper 17.1 cells associate with multiple sclerosis disease  
485 activity: perspectives for early intervention. *Brain* **141**, 1334-1349 (2018).
- 486 27. E. Havrdova *et al.*, Activity of secukinumab, an anti-IL-17A antibody, on brain lesions in  
487 RRMS: results from a randomized, proof-of-concept study. *J Neurol* **263**, 1287-1295  
488 (2016).



- 489 28. C. Luckel *et al.*, IL-17(+) CD8(+) T cell suppression by dimethyl fumarate associates  
490 with clinical response in multiple sclerosis. *Nature communications* **10**, 5722 (2019).
- 491 29. V. Cipollini, J. Anrather, F. Orzi, C. Iadecola, Th17 and Cognitive Impairment: Possible  
492 Mechanisms of Action. *Front Neuroanat* **13**, 95 (2019).
- 493 30. C. Klemann *et al.*, Synthetic retinoid AM80 inhibits Th17 cells and ameliorates  
494 experimental autoimmune encephalomyelitis. *Am J Pathol* **174**, 2234-2245 (2009).
- 495 31. M. Raverdeau, C. J. Breen, A. Misiak, K. H. Mills, Retinoic acid suppresses IL-17  
496 production and pathogenic activity of gammadelta T cells in CNS autoimmunity.  
497 *Immunol Cell Biol* **94**, 763-773 (2016).
- 498 32. J. Xu, P. D. Drew, 9-Cis-retinoic acid suppresses inflammatory responses of microglia  
499 and astrocytes. *J Neuroimmunol* **171**, 135-144 (2006).
- 500 33. M. R. Mizee *et al.*, Astrocyte-derived retinoic acid: a novel regulator of blood-brain  
501 barrier function in multiple sclerosis. *Acta Neuropathol* **128**, 691-703 (2014).
- 502 34. C. Tryfonos *et al.*, Dietary Supplements on Controlling Multiple Sclerosis Symptoms  
503 and Relapses: Current Clinical Evidence and Future Perspectives. *Medicines (Basel)* **6**,  
504 (2019).
- 505 35. M. Lochner *et al.*, In vivo equilibrium of proinflammatory IL-17+ and regulatory IL-10+  
506 Foxp3+ RORgamma t+ T cells. *J Exp Med* **205**, 1381-1393 (2008).
- 507 36. F. Rajaii, Z. T. Bitzer, Q. Xu, S. Sockanathan, Expression of the dominant negative  
508 retinoid receptor, RAR403, alters telencephalic progenitor proliferation, survival, and  
509 cell fate specification. *Dev Biol* **316**, 371-382 (2008).
- 510 37. J. D. Haas *et al.*, CCR6 and NK1.1 distinguish between IL-17A and IFN-gamma-  
511 producing gammadelta effector T cells. *Eur J Immunol* **39**, 3488-3497 (2009).
- 512 38. J. C. Ribot *et al.*, CD27 is a thymic determinant of the balance between interferon-  
513 gamma- and interleukin 17-producing gammadelta T cell subsets. *Nat Immunol* **10**,  
514 427-436 (2009).
- 515 39. J. S. Heilig, S. Tonegawa, Diversity of murine gamma genes and expression in fetal and  
516 adult T lymphocytes. *Nature* **322**, 836-840 (1986).
- 517 40. A. M. McGinley *et al.*, Interleukin-17A Serves a Priming Role in Autoimmunity by  
518 Recruiting IL-1beta-Producing Myeloid Cells that Promote Pathogenic T Cells.  
519 *Immunity* **52**, 342-356 e346 (2020).
- 520 41. R. Agerholm, J. Rizk, M. T. Vinals, V. Bekiaris, STAT3 but not STAT4 is critical for  
521 gammadeltaT17 cell responses and skin inflammation. *EMBO Rep*, e48647 (2019).
- 522 42. E. E. Gray *et al.*, Deficiency in IL-17-committed Vgamma4(+) gammadelta T cells in a  
523 spontaneous Sox13-mutant CD45.1(+) congenic mouse substrain provides protection  
524 from dermatitis. *Nat Immunol* **14**, 584-592 (2013).
- 525 43. V. Bekiaris, J. R. Sedy, M. G. Macauley, A. Rhode-Kurnow, C. F. Ware, The Inhibitory  
526 Receptor BTLA Controls gammadelta T Cell Homeostasis and Inflammatory Responses.  
527 *Immunity* **39**, 1082-1094 (2013).
- 528 44. M. L. Michel *et al.*, Interleukin 7 (IL-7) selectively promotes mouse and human IL-17-  
529 producing gammadelta cells. *Proc Natl Acad Sci U S A* **109**, 17549-17554 (2012).
- 530 45. K. Shibata *et al.*, Notch-Hes1 pathway is required for the development of IL-17-  
531 producing gammadelta T cells. *Blood* **118**, 586-593 (2011).
- 532 46. R. Baccala *et al.*, Gamma delta T cell homeostasis is controlled by IL-7 and IL-15  
533 together with subset-specific factors. *J Immunol* **174**, 4606-4612 (2005).
- 534 47. E. Eden, R. Navon, I. Steinfeld, D. Lipson, Z. Yakhini, GOrilla: a tool for discovery and  
535 visualization of enriched GO terms in ranked gene lists. *BMC Bioinformatics* **10**, 48  
536 (2009).
- 537 48. E. Eden, D. Lipson, S. Yogev, Z. Yakhini, Discovering motifs in ranked lists of DNA  
538 sequences. *PLoS Comput Biol* **3**, e39 (2007).

- 539 49. S. P. Singh, H. H. Zhang, J. F. Foley, M. N. Hedrick, J. M. Farber, Human T cells that are  
540 able to produce IL-17 express the chemokine receptor CCR6. *J Immunol* **180**, 214-221  
541 (2008).
- 542 50. J. Chen *et al.*, The RNA-binding protein HuR contributes to neuroinflammation by  
543 promoting C-C chemokine receptor 6 (CCR6) expression on Th17 cells. *J Biol Chem*  
544 **292**, 14532-14543 (2017).
- 545 51. A. Reboldi *et al.*, C-C chemokine receptor 6-regulated entry of TH-17 cells into the CNS  
546 through the choroid plexus is required for the initiation of EAE. *Nat Immunol* **10**, 514-  
547 523 (2009).
- 548 52. B. E. Theien *et al.*, Discordant effects of anti-VLA-4 treatment before and after onset of  
549 relapsing experimental autoimmune encephalomyelitis. *J Clin Invest* **107**, 995-1006  
550 (2001).
- 551 53. K. G. Haanstra *et al.*, Antagonizing the alpha4beta1 integrin, but not alpha4beta7,  
552 inhibits leukocytic infiltration of the central nervous system in rhesus monkey  
553 experimental autoimmune encephalomyelitis. *J Immunol* **190**, 1961-1973 (2013).
- 554 54. G. P. Rice, H. P. Hartung, P. A. Calabresi, Anti-alpha4 integrin therapy for multiple  
555 sclerosis: mechanisms and rationale. *Neurology* **64**, 1336-1342 (2005).
- 556 55. J. Ransom, P. J. Morgan, P. J. McCaffery, P. N. Stoney, The rhythm of retinoids in the  
557 brain. *J Neurochem* **129**, 366-376 (2014).
- 558 56. N. Noy, Between death and survival: retinoic acid in regulation of apoptosis. *Annu Rev*  
559 *Nutr* **30**, 201-217 (2010).
- 560 57. S. G. Kang, J. Park, J. Y. Cho, B. Ulrich, C. H. Kim, Complementary roles of retinoic acid  
561 and TGF-beta1 in coordinated expression of mucosal integrins by T cells. *Mucosal*  
562 *Immunol* **4**, 66-82 (2011).
- 563 58. M. Iwata *et al.*, Retinoic acid imprints gut-homing specificity on T cells. *Immunity* **21**,  
564 527-538 (2004).
- 565 59. L. Tan *et al.*, Single-Cell Transcriptomics Identifies the Adaptation of Scart1(+)  
566 Vgamma6(+) T Cells to Skin Residency as Activated Effector Cells. *Cell reports* **27**,  
567 3657-3671 e3654 (2019).
- 568 60. T. Chen *et al.*, Epicardial induction of fetal cardiomyocyte proliferation via a retinoic  
569 acid-inducible trophic factor. *Dev Biol* **250**, 198-207 (2002).
- 570 61. L. Lai, B. L. Bohnsack, K. Niederreither, K. K. Hirschi, Retinoic acid regulates endothelial  
571 cell proliferation during vasculogenesis. *Development* **130**, 6465-6474 (2003).
- 572 62. D. F. Nino *et al.*, Retinoic Acid Improves Incidence and Severity of Necrotizing  
573 Enterocolitis by Lymphocyte Balance Restitution and Repopulation of LGR5+ Intestinal  
574 Stem Cells. *Shock* **47**, 22-32 (2017).
- 575 63. A. Ertesvag, N. Engedal, S. Naderi, H. K. Blomhoff, Retinoic acid stimulates the cell cycle  
576 machinery in normal T cells: involvement of retinoic acid receptor-mediated IL-2  
577 secretion. *J Immunol* **169**, 5555-5563 (2002).
- 578 64. N. Engedal, T. Gjevik, R. Blomhoff, H. K. Blomhoff, All-trans retinoic acid stimulates IL-  
579 2-mediated proliferation of human T lymphocytes: early induction of cyclin D3. *J*  
580 *Immunol* **177**, 2851-2861 (2006).
- 581 65. G. Eberl, D. R. Littman, Thymic origin of intestinal alphabeta T cells revealed by fate  
582 mapping of RORgammat+ cells. *Science* **305**, 248-251 (2004).
- 583 66. N. L. Bray, H. Pimentel, P. Melsted, L. Pachter, Near-optimal probabilistic RNA-seq  
584 quantification. *Nat Biotechnol* **34**, 525-527 (2016).
- 585 67. M. I. Love, W. Huber, S. Anders, Moderated estimation of fold change and dispersion for  
586 RNA-seq data with DESeq2. *Genome Biol* **15**, 550 (2014).
- 587

588

589 **Acknowledgments**

590 We are grateful to Professors William Agace (Lund University, Sweden, and DTU, Denmark) and  
591 Shan Sockanathan (Johns Hopkins School of Medicine, MD) for providing us with RAR<sup>dn</sup><sup>F/F</sup> mice  
592 and Professor Gerard Eberl (Pasteur, Paris, France) for providing us with ROR<sup>γ</sup><sup>CRE</sup> mice. The  
593 study and VB were supported by the Lundbeck Foundation (R163-2013-15201), RA and JR were  
594 supported by DTU PhD scholarships, DK was supported by the Leo Foundation (LF16020), AB  
595 was supported by Novo Nordisk Foundation (NNF1OC0052931), and SRH supported by Lundbeck  
596 Foundation (R190-2014-4178)

597

598

599

600

## Figures

### Figure 1

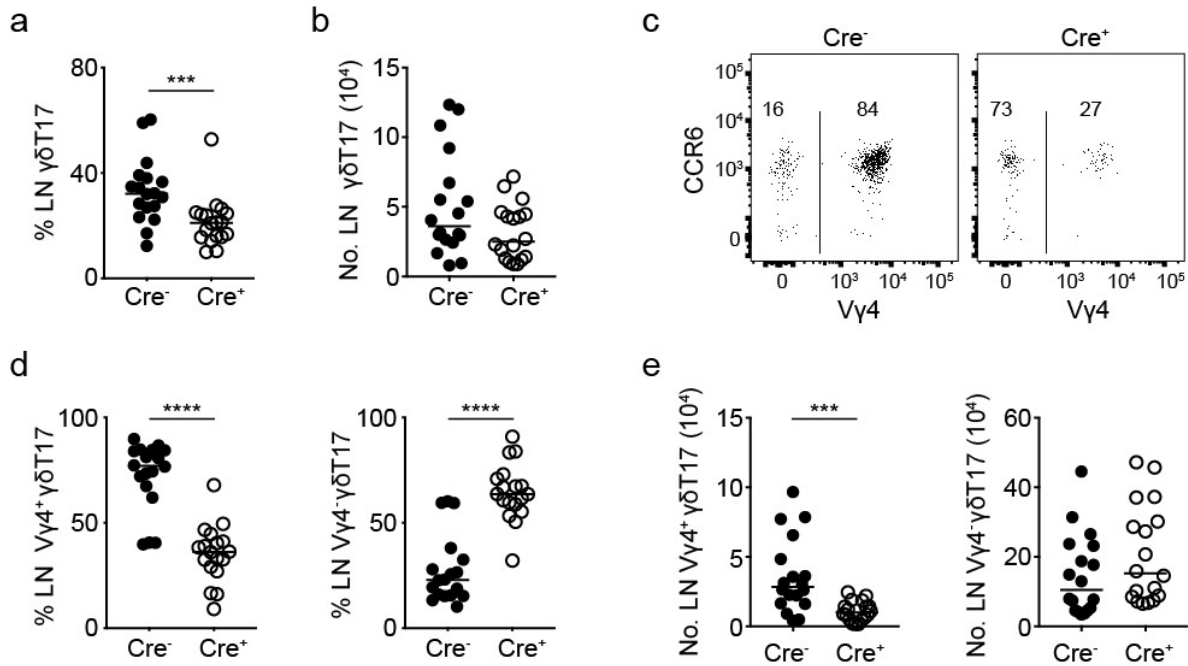

601

602 **Fig1. Aberrant homeostasis of  $\gamma\delta$ T17 cell populations in the lymph node of ROR $\gamma$ t<sup>CRE</sup>-**

603 **RARdn<sup>F/F</sup> mice.**

604 Flow cytometric analysis of  $\gamma\delta$  T cells in ROR $\gamma$ t<sup>CRE</sup>-RARdn<sup>F/F</sup> (Cre<sup>+</sup>) and littermate control mice

605 (Cre<sup>-</sup>). In graphs, each symbol represents a mouse and line the median. \*\*\*p < 0.001, \*\*\*\*p <

606 0.0001 using Mann-Whitney test. (A, B) Frequency (A) and numbers (B) of  $\gamma\delta$ T17

607 (CD27<sup>-</sup>CD44<sup>+</sup>TCR $\gamma\delta$ <sup>+</sup>TCR $\beta$ <sup>-</sup>) cells in the LN. (C) Expression of V $\gamma$ 4 and CCR6 within the  $\gamma\delta$ T17

608 compartment; numbers indicate frequency of V $\gamma$ 4<sup>+</sup> and V $\gamma$ 4<sup>-</sup> cells. (D) Frequency of V $\gamma$ 4<sup>+</sup> (left) and

609 V $\gamma$ 4<sup>-</sup> (right)  $\gamma\delta$ T17 cells in the LN. (E) Numbers of V $\gamma$ 4<sup>+</sup> (left) and V $\gamma$ 4<sup>-</sup> (right)  $\gamma\delta$ T17 cells in the LN.

610 n = 5 experiments, 18 mice per genotype.

## Figure 2

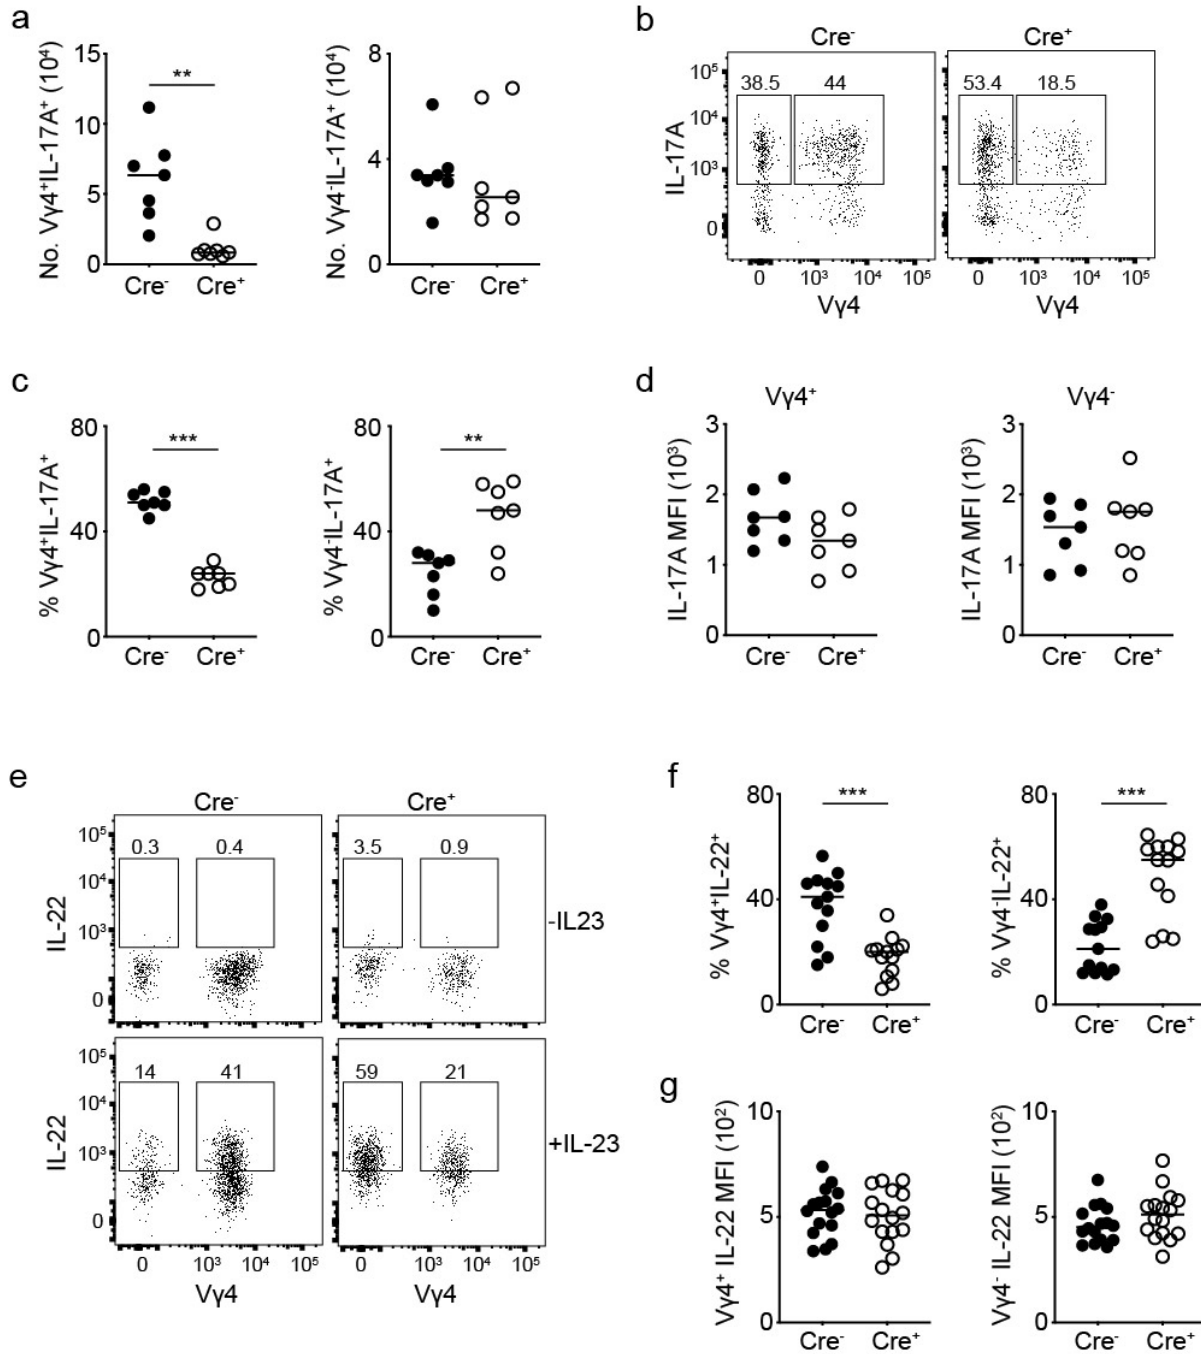

611

612 **Figure 2. Production of IL-17A and IL-22 by  $\gamma\delta$ T17 cells independent of RAR.**

613 Flow cytometric analysis of cytokine-producing  $\gamma\delta$  T cells in ROR $\gamma$ t<sup>CRE</sup>-RAR<sup>dn</sup><sup>F/F</sup> (Cre<sup>+</sup>) and  
 614 littermate control mice (Cre<sup>-</sup>). In graphs, each symbol represents a mouse and line the median. \*\*p  
 615 < 0.01, \*\*\*p < 0.001 using Mann-Whitney test. **(A)** Numbers of Vγ4<sup>+</sup>IL-17A<sup>+</sup> (left) and Vγ4<sup>-</sup>IL-17A<sup>+</sup>  
 616 (right)  $\gamma\delta$ T17 cells. **(B)** Expression of Vγ4 and IL-17A within the  $\gamma\delta$ T17 compartment; numbers  
 617 indicate frequencies of Vγ4<sup>+</sup>IL-17A<sup>+</sup> and Vγ4<sup>-</sup>IL-17A<sup>+</sup>

618  $V\gamma 4^{-}IL-17A^{+}$  (right)  $\gamma\delta T17$  cells. **(D)** Mean fluorescent intensity (MFI) of IL-17A staining in  $V\gamma 4^{+}$   
619 (left) and  $V\gamma 4^{-}$  (right)  $\gamma\delta T17$  cells. **(E)** Expression of  $V\gamma 4$  and IL-22 within the  $\gamma\delta T17$  compartment  
620 in the presence or absence of IL-23 stimulation; numbers indicate frequency of  $V\gamma 4^{+}IL-22^{+}$  and  
621  $V\gamma 4^{-}IL-22^{+}$  cells. **(F)** Frequency of  $V\gamma 4^{+}IL-22^{+}$  (left) and  $V\gamma 4^{-}IL-22^{+}$  (right)  $\gamma\delta T17$  cells after IL-23  
622 stimulation. **(G)** MFI of IL-22 staining in  $V\gamma 4^{+}$  (left) and  $V\gamma 4^{-}$  (right)  $\gamma\delta T17$  cells after IL-23  
623 stimulation.  $n = 3$  experiments, 7 mice per genotype (a-d); or  $n = 5$  experiments, 13 mice per  
624 genotype (e, f, g).

Figure 3

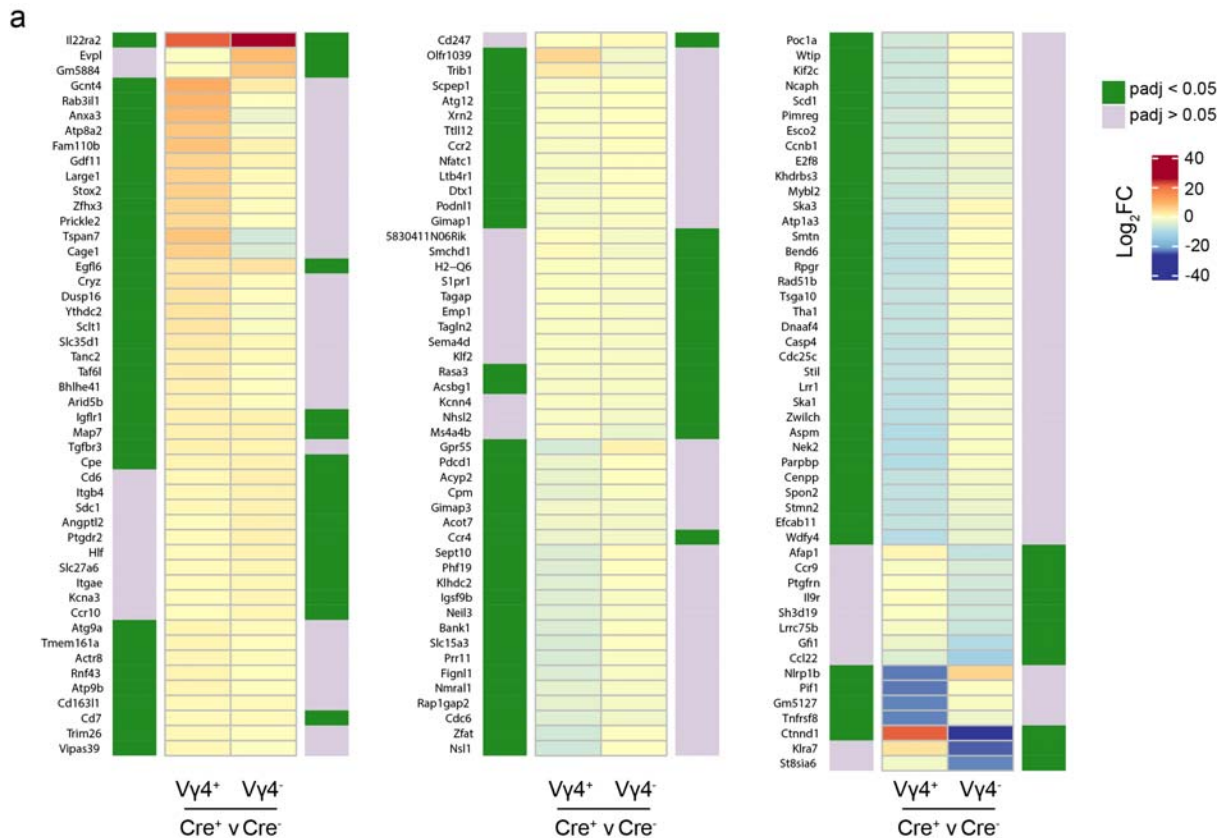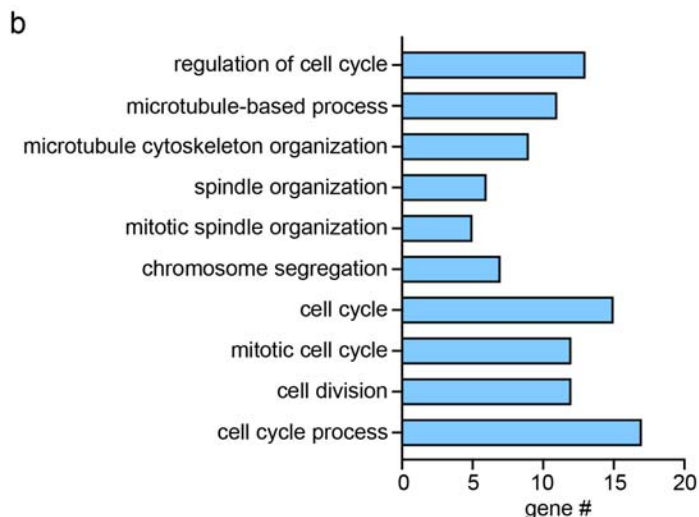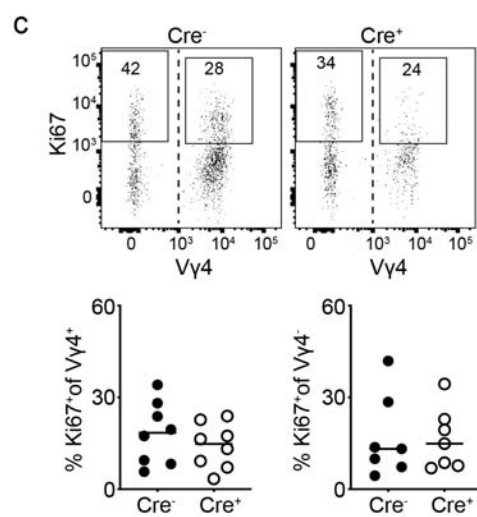

625

626 **Figure 3. Regulation of cell cycle genes by RAR in  $\gamma\delta\text{T17}$  cell populations.**

627 Analysis of differentially expressed genes in  $\text{Vy4}^+$  and  $\text{Vy4}^-$   $\gamma\delta\text{T17}$  cells isolated from  $\text{ROR}\gamma\text{t}^{\text{CRE-}}$

628  $\text{RAR}\alpha^{\text{F/F}}$  ( $\text{Cre}^+$ ) or littermate control mice ( $\text{Cre}^-$ ) after RNA-sequencing. Data is representative of 3

629 biological repeats. (A) Heatmap showing the average  $\text{Log}_2\text{FC}$  (fold-change) of significantly

630 changed genes in either  $\text{Vy4}^+$  or  $\text{Vy4}^-$  cells. Genes with significant  $\text{Log}_2\text{FC}$  ( $\text{padj} < 0.05$ ) in each

631 comparison are marked as green in the adjacent column, while insignificant changes ( $\text{padj} > 0.05$ )

632 are marked as purple. **(B)** GOrilla pathway analysis of the differentially downregulated genes ( $p$ adj  
 633  $< 0.05$ ) in  $V\gamma 4^+$  cells from  $ROR\gamma t^{CRE-RARdn^{F/F}}$  ( $Cre^+$ ) compared to littermate control mice ( $Cre^-$ ).  
 634 Number of enriched genes in each pathway is shown on the x-axis and the pathways are arranged  
 635 by significance score on the y-axis (only significantly enriched pathways are shown). **(C)** Flow  
 636 cytometric analysis of Ki67 expression in  $\gamma\delta T17$  cells in  $ROR\gamma t^{CRE-RARdn^{F/F}}$  ( $Cre^+$ ) and littermate  
 637 control mice ( $Cre^-$ ); numbers in FACS plots indicate frequencies of  $Ki67^+$  cells within the  $V\gamma 4^+$  or  
 638  $V\gamma 4^-$  compartments; in graphs, each symbol represents a mouse and line the median;  $n = 4$   
 639 experiments, 7-8 mice per genotype.

Figure 4

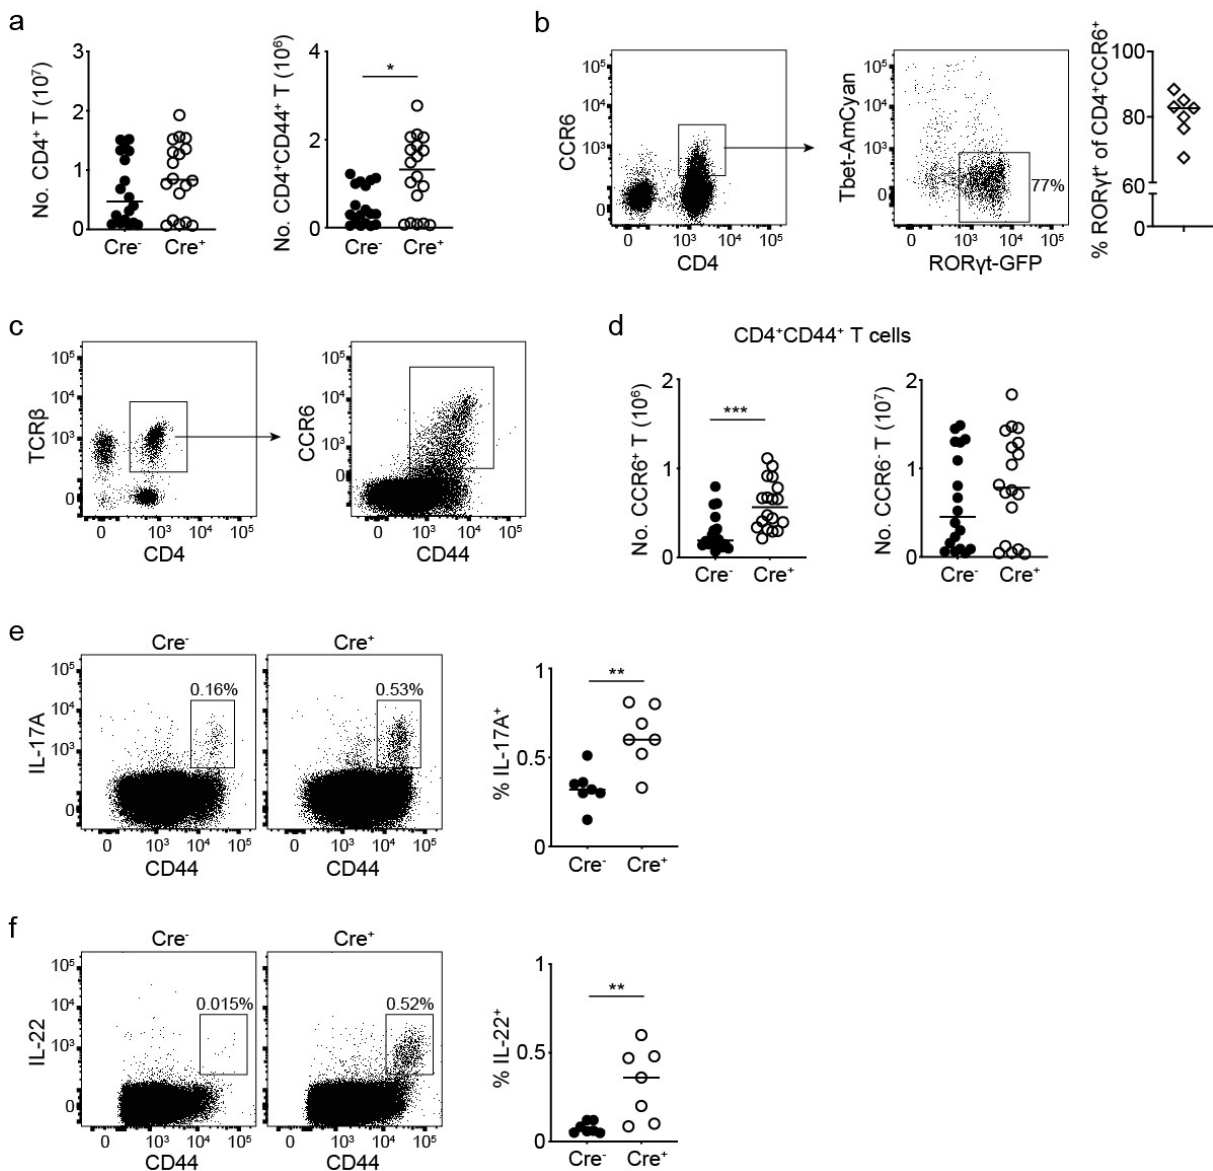

640

641 **Figure 4. RAR negatively regulates the homeostasis of  $T_H17$  cells.**



642 Flow cytometric analysis of lymph node CD4<sup>+</sup> T cells in RORγt<sup>CRE</sup>-RARdn<sup>F/F</sup> (Cre<sup>+</sup>) and littermate  
643 control mice (Cre<sup>-</sup>) unless specified. In graphs, each symbol represents a mouse and line the  
644 median. \*p < 0.05, \*\*p < 0.01, \*\*\*p < 0.001 using Mann-Whitney test. **(A)** Numbers of CD4<sup>+</sup> (left)  
645 and CD4<sup>+</sup>CD44<sup>+</sup> (right) T cells. **(B)** Expression of CD4 and CCR6 within the TCRβ compartment  
646 (left) of RORγt<sup>GFP</sup>-Tbet<sup>AmCyan</sup> mice, and frequency of RORγt-GFP<sup>+</sup> cells within the CD4<sup>+</sup>CCR6<sup>+</sup> gate  
647 (right). **(C)** Expression of CD4 and TCRβ within the lymphocyte compartment (left), and expression  
648 of CD44 and CCR6 within the CD4<sup>+</sup>TCRβ<sup>+</sup> gate (right). **(D)** Numbers of CCR6<sup>+</sup> (left) and CCR6<sup>-</sup>  
649 (right) cells within the CD4<sup>+</sup>CD44<sup>+</sup> compartment. **(E)** Expression of CD44 and IL-17A, and  
650 frequency of IL-17A<sup>+</sup> cells within the CD4<sup>+</sup>TCRβ<sup>+</sup> compartment; numbers in FACS plots indicate  
651 frequencies of IL-17A<sup>+</sup> cells. **(F)** Expression of CD44 and IL-22, and frequency of IL-22<sup>+</sup> cells within  
652 the CD4<sup>+</sup>TCRβ<sup>+</sup> compartment; numbers in FACS plots indicate frequencies of IL-22<sup>+</sup> cells. *n* = 5  
653 experiments, 18 mice per genotype (a, c, d); *n* = 1 experiment, 7 mice (b); or *n* = 3 experiments, 7  
654 mice per genotype (e, f).

## Figure 5

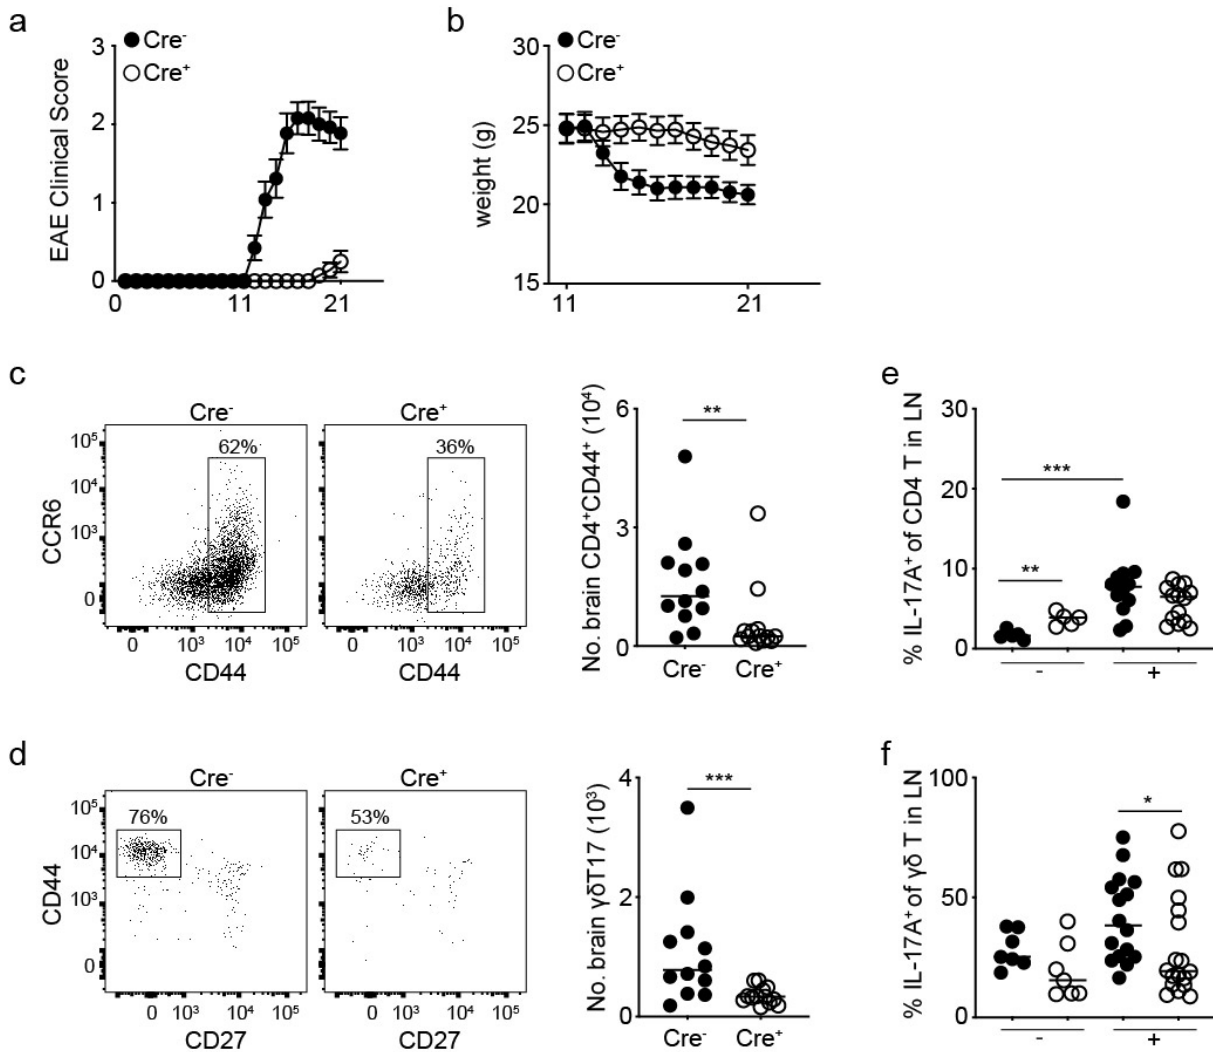

655

656 **Figure 5. RAR is necessary for EAE pathogenesis.**

657 Disease progression and flow cytometric analysis of  $\gamma\delta$  and  $CD4^+$  T cells in  $ROR\gamma^{\text{CRE}}\text{-RAR}^{\text{dn F/F}}$   
 658 ( $Cre^+$ ) and littermate control mice ( $Cre^-$ ) before (-) and 21 days after (+) EAE induction. In graphs,  
 659 each symbol represents a mouse and line the median (except in **A**, **B**). \* $p < 0.05$ , \*\* $p < 0.01$ , \*\*\* $p <$   
 660  $0.001$  using Mann-Whitney test. (**A**, **B**) Clinical symptoms of EAE (**A**) and mouse weight (**B**); data  
 661 is a pool of 13-14 mice per genotype from 4 experiments and shown as mean $\pm$ sem; 2-way ANOVA  
 662 with Bonferroni's multiple comparisons test returned significance for days 14-21  $p < 0.0001$  (**A**) and  
 663 days 15-17  $p < 0.05$  (**B**). (**C**) Expression of CD44 and CCR6 in the  $CD4^+\text{TCR}\beta^+$  compartment, and  
 664 numbers of  $CD4^+\text{CD44}^+$  T cells in the brain; numbers in FACS plots indicate  $CD44^+$  cell  
 665 frequencies. (**D**) Expression of CD27 and CD44 in the  $\text{TCR}\gamma\delta^+\text{TCR}\beta^-$  compartment, and numbers

666 of  $\gamma\delta$ T17 (CD27<sup>-</sup>CD44<sup>+</sup>) T cells in the brain; numbers in FACS plots indicate  $\gamma\delta$ T17 cell  
667 frequencies. (E) Frequency of IL-17A<sup>+</sup> cells within the LN CD4<sup>+</sup>TCR $\beta$ <sup>+</sup> compartment. (F) Frequency  
668 of IL-17A<sup>+</sup> cells within the LN TCR $\gamma\delta$ <sup>+</sup>TCR $\beta$ <sup>-</sup> compartment.  $n = 4$  experiments, 7 control or 16-18  
669 EAE mice per genotype.

## Figure 6

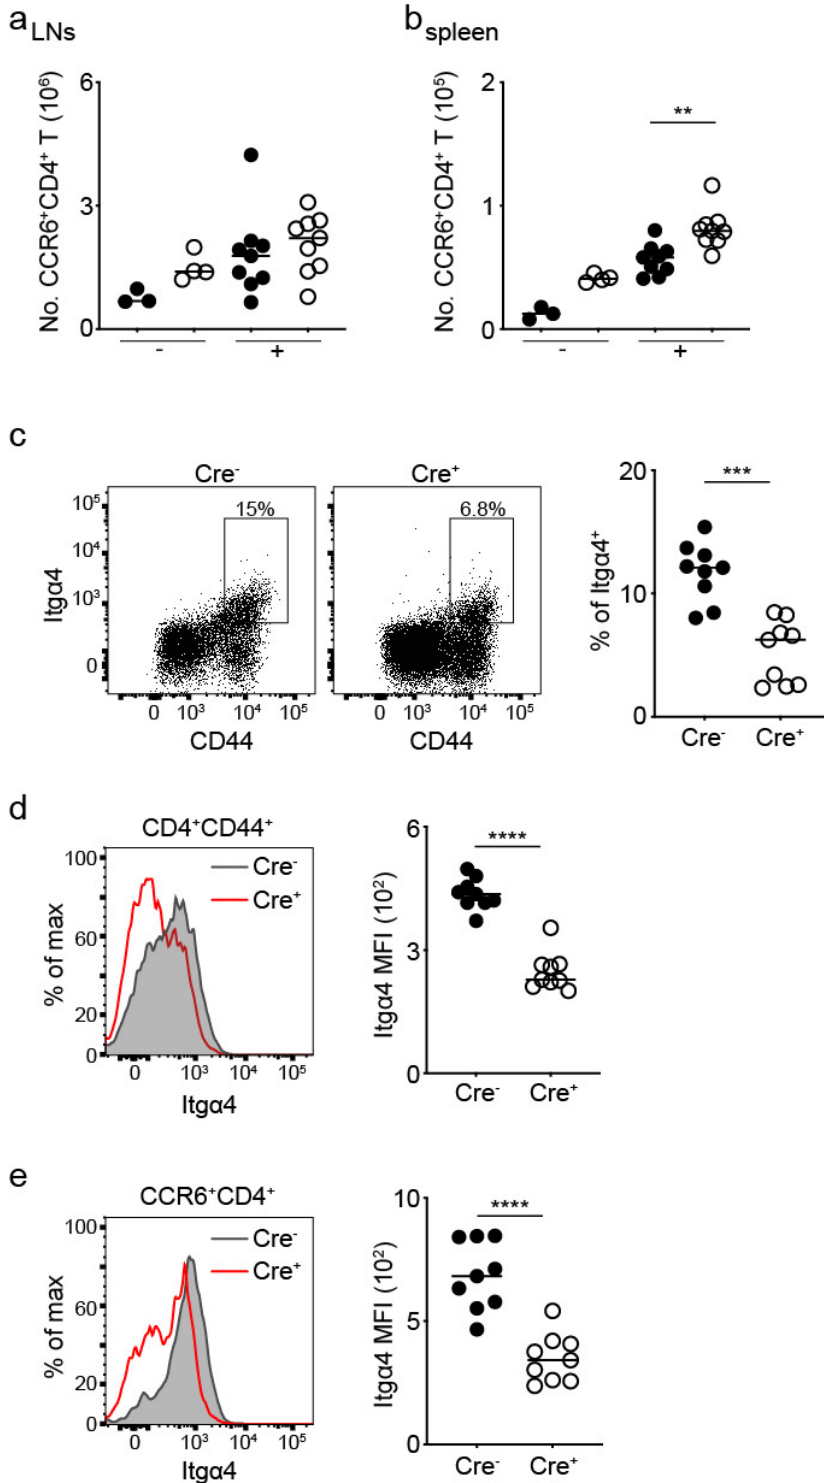

670

671 **Figure 6. RAR regulates integrin-α4 on CD4<sup>+</sup> T cells but not their expansion during the early**  
 672 **phase of EAE.**

673 Flow cytometric analysis of lymph node (a) and splenic (b-e) CD4<sup>+</sup> T cells in RORγt<sup>CRE</sup>-RARdn<sup>F/F</sup>

674 (Cre<sup>+</sup>) and littermate control mice (Cre<sup>-</sup>) before (-) and 11 days after (+) EAE induction. In graphs,

675 each symbol represents a mouse and line the median. \*\* $p < 0.01$ , \*\*\* $p < 0.001$ , \*\*\*\* $p < 0.0001$   
676 using Mann-Whitney test. **(A, B)** Numbers of CCR6<sup>+</sup>CD4<sup>+</sup> T cells in the LNs **(A)** and spleen **(B)**  
677 before (-) and 11 days after (+) EAE induction. **(C)** Expression of CD44 and Itgα4, and frequency  
678 of Itgα4<sup>+</sup> cells within the CD4<sup>+</sup>TCRβ<sup>+</sup> compartment at day 11; numbers in FACS plots indicate  
679 frequencies of Itgα4<sup>+</sup> cells. **(D, E)** Expression of Itgα4, and MFI of Itgα4 staining in CD4<sup>+</sup>CD44<sup>+</sup> **(D)**  
680 and in CCR6<sup>+</sup>CD4<sup>+</sup> **(E)** T cells at day 11.  $n = 3$  experiments, 5-6 control or 13 EAE mice per  
681 genotype (a, b); or  $n = 2$  experiments, 9 mice per genotype (c-e).

## Figure 7

### a $\gamma\delta$ T17 cells in LNs

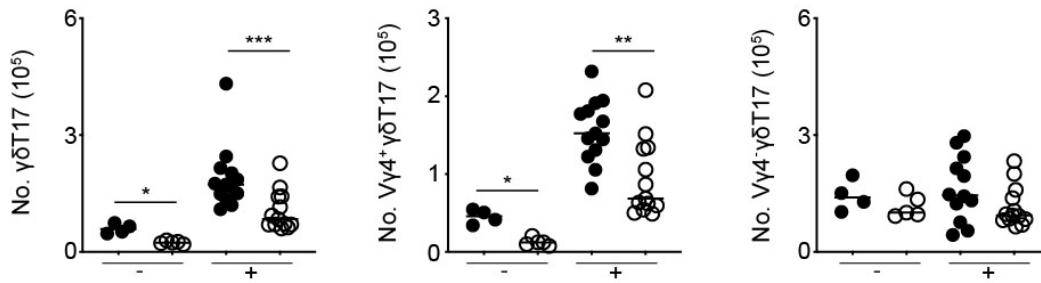

### b $\gamma\delta$ T17 cells in spleen

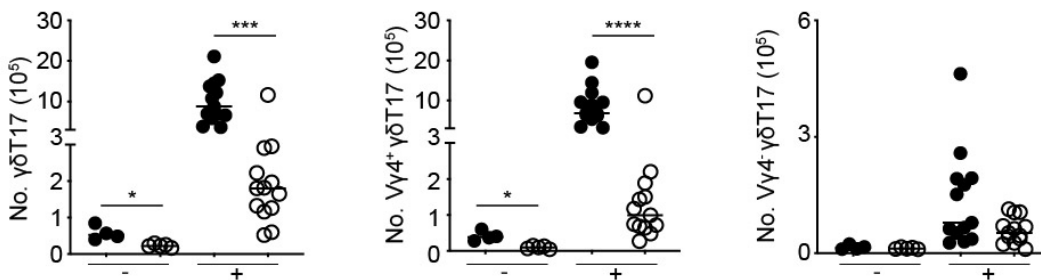

### c

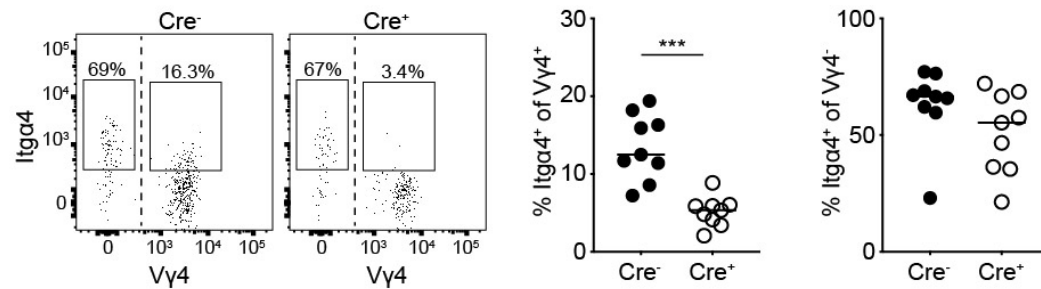

### d

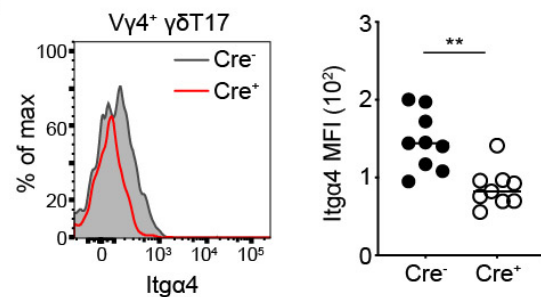

### e

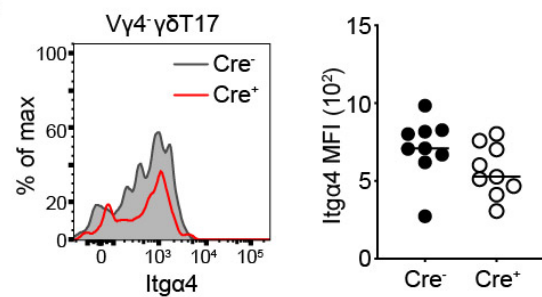

682

683 **Figure 7. RAR is necessary for optimal expansion of  $\gamma\delta$ T17 cells and the expression of**  
 684 **integrin- $\alpha 4$  during the early phase of EAE.**

685 Flow cytometric analysis of lymph node (A) and splenic (B-E)  $\gamma\delta$ T17 cells in  $ROR\gamma t^{Cre}-RARdn^{F/F}$

686 ( $Cre^+$ ) and littermate control mice ( $Cre^-$ ) before (-) and 11 days after (+) EAE induction. In graphs,

687 each symbol represents a mouse and line the median. \* $p < 0.05$ , \*\* $p < 0.01$ , \*\*\* $p < 0.001$ , \*\*\*\* $p <$   
688 0.0001 using Mann-Whitney test. **(A, B)** Numbers of total  $\gamma\delta T17$  (left),  $V\gamma 4^+$  (middle) and  $V\gamma 4^-$   
689 (right) cells in LNs **(A)** and spleen **(B)** before (-) and 11 days after (+) EAE induction. **(C)**  
690 Expression of  $V\gamma 4$  and  $I\text{t}\alpha 4$  within the  $\gamma\delta T17$  compartment, and frequency of  $I\text{t}\alpha 4^+$  cells within  
691 the  $V\gamma 4^+$  or  $V\gamma 4^-$  compartments at day 11; numbers in FACS plots indicate frequencies of  $I\text{t}\alpha 4^+$   
692 cells within  $V\gamma 4^+$  or  $V\gamma 4^-$  compartments. **(D, E)** Expression of  $I\text{t}\alpha 4$ , and MFI of  $I\text{t}\alpha 4$  staining in  
693  $V\gamma 4^+$  **(E)** and in  $V\gamma 4^-$  **(E)**  $\gamma\delta T17$  cells at day 11.  $n = 3$  experiments, 5-6 control or 13 EAE mice per  
694 genotype (a, b); or  $n = 2$  experiments, 9 mice per genotype (c-e).  
695  
696
